# Supplementary material for: Elective Ascending Aortic Aneurysm Surgery in the Elderly
Source: MDPI journal article supplement (doi:10.3390/jcm12052015), 2023-03-03
Supplement: s1 [file s1]

## **Supplementary Material**

### **Supplemental File S1. Performed Surgical Techniques in this Study**

During the inclusion period, there was a substantial variability in the applied surgical techniques. Below we describe the most commonly used surgical procedures are described here. The surgical interventions were performed using a median sternotomy approach. After heparinization, cardiopulmonary bypass (CPB) was initiated which was followed by aortic clamping. Due to the elective character of the surgical interventions, it was in most cases possible to cannulate in the ascending aorta. However, the aortic arch, femoral artery and subclavian artery were used as well. Venous cannulation was performed by using a two-stage cannula in the right atrium and inferior vena cava, or cannulation in the superior and inferior vena cava or in the femoral artery. Myocardial protection was performed with the use of cold cardioplegia. If deep hypothermic cardiac arrest (DHCA) was performed, patients were cooled to a nasal temperature of 20 or 25 °C until pO<sub>2</sub> was 40 mmHg. In most cases, uni- or bilateral antegrade cerebral perfusion (ACP) was used, especially when a long DHCA time (>30 minutes) was expected. Indications for DHCA include congenital aortic arch surgery and heavy aortic calcification since distal aortic clamping would increase stroke risk. In the final years of the study, bilateral ACP was mainly used, with cooling down to below 25 degrees. When DHCA was not performed, a temperature of 32 to 35 degrees was maintained for the moderate hypothermia.

Depending on the indication, and surgeon and patient preference, Bentall(- de Bono) (1), Valve Sparing Aortic Root Replacement (VSARR) or Supracoronary Aorta Replacement (SCAR) were performed.

In the Bentall procedure, the mechanical Bentall was a ready-made tube plus valve in one. The biological Bentall was either constructed in the operating room or was a ready-made

compound conduit. Firstly, the enlarged portion of the ascending aorta and the aortic valve were explanted and the coronary buttons were prepared, placing U-stitches around. The graft with valve was replaced and then an edge of aortic tissue was adhered to the prosthesis for hemostasis. Hereafter, the coronary buttons were reimplanted. Finally, an end-to-end anastomosis between prosthesis and native distal aorta was performed.

The VSARR included the David (or reimplantation) (2) and Yacoub (or remodeling) (3) techniques. In the David technique, the coronary buttons were prepared and the aortic wall was excised. The stitches were placed on felt. Then, the stitches were pulled through the base of the prosthesis and tied off. The valve was reimplanted in the prosthesis. The edges of aortic tissue were then adhered to the prosthesis, with anchoring of the commissures. Finally, end-to-end anastomosis of the graft to the distal aorta was performed.

Two Yacoub techniques were performed during the study period: the classic Yacoub and the partial Yacoub technique, which was performed in most of the patients. In the Yacoub technique, the annulus of the aorta was not involved in the procedure compared to the David technique. Furthermore, the partial Yacoub procedure consisted of the excision of the non-coronary sinus.

Finally, SCAR was also performed in the study cohort. The aorta was excised above the sinuses of Valsalva, and the graft was anastomosed to the aortic root, after which an end-to-end anastomosis of the graft to the distal aorta was performed.

- (1) Bentall H, De Bono A. A technique for complete replacement of the ascending aorta. *Thorax*. 1968;23(4):338-9.

(2) David TE, David CM, Manlhiot C, Colman J, Crean AM, Bradley T. Outcomes of Aortic Valve-Sparing Operations in Marfan Syndrome. *J Am Coll Cardiol*. 2015;66(13):1445-53.

(3) Yacoub M. (1996). Valve-Conserving Operation for Aortic Root Aneurysm or Dissection. *Operative Techniques in Cardiac & Thoracic Surgery*, Vol 1, No 1 (July), 1996: pp 57-67.

## Supplemental File S2. Definitions of all included variables.

| <i>Variable</i>                              | <i>Unit</i>       | <i>Definition</i>                                                                                                                                                                                                                                                                                                |
|----------------------------------------------|-------------------|------------------------------------------------------------------------------------------------------------------------------------------------------------------------------------------------------------------------------------------------------------------------------------------------------------------|
| <b><i>Patient Characteristics</i></b>        |                   |                                                                                                                                                                                                                                                                                                                  |
| <i>Year of birth</i>                         |                   | Year of birth                                                                                                                                                                                                                                                                                                    |
| <i>Age at time of surgery</i>                | years             |                                                                                                                                                                                                                                                                                                                  |
| <i>Sex</i>                                   | none              | Sex: male or female                                                                                                                                                                                                                                                                                              |
| <i>Height</i>                                | meters            | At admittance or last measured before surgery                                                                                                                                                                                                                                                                    |
| <i>Weight</i>                                | kilograms         | At admittance or last measured before surgery                                                                                                                                                                                                                                                                    |
| <i>Body surface area</i>                     | m <sup>2</sup>    | At admittance or last measured before surgery                                                                                                                                                                                                                                                                    |
| <i>Body mass index</i>                       | kg/m <sup>2</sup> | At admittance or last measured before surgery                                                                                                                                                                                                                                                                    |
| <i>Prior aortic surgery</i>                  |                   | Has the patient had aortic surgery before? Options: same part of aorta, other part of aorta, same and other part of aorta, other and unknown.                                                                                                                                                                    |
| <i>Description of prior aortic surgery</i>   |                   | Short description of prior aortic surgery including date of prior surgery                                                                                                                                                                                                                                        |
| <i>Prior cardiac surgery</i>                 |                   | Has the patient had cardiac surgery before? Options: CABG, PTCA, AVR, CABG+AVR, other and unknown.                                                                                                                                                                                                               |
| <i>Description of prior cardiac surgery</i>  |                   | Short description of prior cardiac surgery including date of prior surgery                                                                                                                                                                                                                                       |
| <i>Recent myocardial infarction</i>          |                   | (N)STEMI < 90 days of presentation                                                                                                                                                                                                                                                                               |
| <i>History of myocardial infarction</i>      |                   | (N)STEMI in patient history: > 90 days before presentation                                                                                                                                                                                                                                                       |
| <i>History of aortic valve stenosis</i>      |                   | Is the patient known with aortic valve stenosis?<br><br>Trace= grade 1, slight= grade 2, moderate= grade 3, severe= grade 4.<br><br>Moderate aortic valve stenosis: V <sub>max</sub> 3.0-3.9 m/s and AVA 1.1-1.5 cm <sup>2</sup> , and severe stenosis: V <sub>max</sub> ≥4.0 m/s and AVA ≤1.0 cm <sup>2</sup> . |
| <i>History of aortic valve insufficiency</i> |                   | Is the patient known with aortic valve insufficiency?<br><br>Trace= grade 1, slight= grade 2, moderate= grade 3, severe= grade 4.<br><br>Moderate aortic valve insufficiency: jet width 25-64% of the left ventricular outflow tract (LVOT), and severe insufficiency: ≥65% of LVOT.                             |
| <i>Mixed aortic valve disease</i>            |                   | Mixed disease is defined as stenosis and regurgitation                                                                                                                                                                                                                                                           |

|                                                                                      |                                                                                                                                                                                                                                                     |
|--------------------------------------------------------------------------------------|-----------------------------------------------------------------------------------------------------------------------------------------------------------------------------------------------------------------------------------------------------|
| <i>History of mitral valve stenosis</i>                                              | Is the patient known with mitral valve stenosis?<br><br>Trace= grade 1, slight= grade 2, moderate= grade 3, severe= grade 4                                                                                                                         |
| <i>History of mitral valve insufficiency</i>                                         | Is the patient known with mitral valve insufficiency?<br><br>Trace= grade 1, slight= grade 2, moderate= grade 3, severe= grade 4                                                                                                                    |
| <i>History of hypertension</i>                                                       | Medical treatment for hypertension or recorded in patient history                                                                                                                                                                                   |
| <i>History of diabetes mellitus</i>                                                  | Medical treatment for diabetes mellitus or recorded in patient history. Options: NIDDM, IDDM and unknown.                                                                                                                                           |
| <i>History of COPD</i>                                                               | History of COPD that required medical treatment or when FEV1 was <70%                                                                                                                                                                               |
| <i>History of CVA</i>                                                                | TIA and/or CVA in patient history                                                                                                                                                                                                                   |
| <i>History of chronic kidney disease</i>                                             | Is the patient known with chronic kidney disease? Yes when this is recorded in patient history. Thus, it is not dependent on the current eGFR.                                                                                                      |
| <i>History of renal dialysis</i>                                                     | The patient is currently receiving any type of renal dialysis for chronic kidney disease                                                                                                                                                            |
| <i>History of smoking</i>                                                            | From at least 1 packyear. Options: never, currently, in past and unknown.                                                                                                                                                                           |
| <i>History of hyperlipidaemia</i>                                                    | Medical treatment for hyperlipidaemia/dyslipidaemia/hypercholesterolemia or recorded in patient history                                                                                                                                             |
| <i>Prior dissection or aneurysm in a major artery other than the thoracic aorta?</i> | Is the patient familiar with a dissection elsewhere (every vessel except the thoracic aorta)?                                                                                                                                                       |
| <i>Known genetic disease prior to surgery?</i>                                       | Any genetic disorder confirmed by genetic testing, if not confirmed then: suspected. Options: Marfan syndrome, Loeys-Dietz syndrome, SMAD3 gene mutation, Ehlers-Danlos syndrome, ACTA 2 gene mutation, MYH11 mutation, Turner syndrome, et cetera. |
| <i>Is there a positive family history of aortic pathology?</i>                       | 1st or 2nd degree family member with: thoracic aortic aneurysm or dissection; an aneurysm or dissection elsewhere < 60 y; congenital left sided heart disease or sudden death <45y.                                                                 |
| <i>Is there a positive family history of any connective tissue disorder?</i>         | Any connective tissue disorder in 1st or 2nd degree family members                                                                                                                                                                                  |

| <i>Remarks patient characteristics</i>                                    |             | Any remarks regarding patient characteristics                                                                                                                                                                                  |
|---------------------------------------------------------------------------|-------------|--------------------------------------------------------------------------------------------------------------------------------------------------------------------------------------------------------------------------------|
| <b>Pre-operative</b>                                                      |             |                                                                                                                                                                                                                                |
| <i>How did the patient present to the clinic for the very first time?</i> |             | How was the aortic aneurysm discovered? Options: coincidental finding, (family) screening, (suspected) connective tissue disorder, exercise related symptoms/complaints, non-exercise related symptoms/complaints and unknown. |
| <i>At which location was the maximal diameter of the aorta measured?</i>  |             | Location of the maximal aortic diameter. Options: sinuses of Valsalva, ascending aorta, aortic arch, descending aorta, abdominal aorta and unknown.                                                                            |
| <i>Maximal aortic diameter measured before surgery</i>                    | millimetres | Measured diameter of maximal aortic diameter                                                                                                                                                                                   |
| <i>Dilatation of aortic valve annulus</i>                                 |             | As described in the patient files (>40 mm)                                                                                                                                                                                     |
| <i>Dilatation of Sinuses of Valsalva</i>                                  |             | As described in the patient files (>40 mm)                                                                                                                                                                                     |
| <i>Dilatation of ascending aorta</i>                                      |             | As described in the patient files (>40 mm)                                                                                                                                                                                     |
| <i>Dilatation of aortic arch</i>                                          |             | As described in the patient files (>40 mm)                                                                                                                                                                                     |
| <i>Dilatation of descending aorta</i>                                     |             | As described in the patient files (>40 mm)                                                                                                                                                                                     |
| <i>Dilatation of abdominal aorta</i>                                      |             | As described in the patient files (>30 mm)                                                                                                                                                                                     |
| <i>Does the aortic aneurysm extend into the brachiocephalic artery?</i>   |             | Does the patient has dilatation/aneurysm of the brachiocephalic artery at the same time?                                                                                                                                       |
| <i>Does the aortic aneurysm extend into the carotid artery?</i>           |             | Does the patient has dilatation/aneurysm of the carotid artery (left and/or right) at the same time?                                                                                                                           |
| <i>Does the aortic aneurysm extend into the subclavian artery?</i>        |             | Does the patient has dilatation/aneurysm of the subclavian artery at the same time?                                                                                                                                            |

|                                                                                                                                                         |            |                                                                                                                                                                                                                                                                                                                                                                             |
|---------------------------------------------------------------------------------------------------------------------------------------------------------|------------|-----------------------------------------------------------------------------------------------------------------------------------------------------------------------------------------------------------------------------------------------------------------------------------------------------------------------------------------------------------------------------|
| <i>Intramural hematoma present before surgery?</i>                                                                                                      |            | Intramural hematoma of the aorta present?                                                                                                                                                                                                                                                                                                                                   |
| <i>Intramural ulcer present before surgery?</i>                                                                                                         |            | Intramural ulcer of the aorta present?                                                                                                                                                                                                                                                                                                                                      |
| <i>NYHA classification at presentation</i>                                                                                                              |            | As described in patient files. Options: NYHA class I, NYHA class II, NYHA class III, NYHA class IV and unknown.                                                                                                                                                                                                                                                             |
| <i>CCS classification at presentation</i>                                                                                                               |            | As described in patient files. Options: CCS I, CCS II, CCS III, CCS IV and unknown.                                                                                                                                                                                                                                                                                         |
| <i>Glomerular filtration rate</i>                                                                                                                       | ml/min     | Measured at admittance, or maximum 1y before surgery. For the study, only the CKD-EPI eGFR measurement was used.                                                                                                                                                                                                                                                            |
| <i>Date of last eGFR measurement before surgery</i>                                                                                                     | dd-mm-yyyy | Date of last eGFR measurement was performed before surgery                                                                                                                                                                                                                                                                                                                  |
| <i>Creatinin-level</i>                                                                                                                                  | micromol/L | Measured at admittance, or maximum 1y before surgery                                                                                                                                                                                                                                                                                                                        |
| <i>Date of last creatinin measurement before surgery</i>                                                                                                | dd-mm-yyyy | Date of last creatinin measurement was performed before surgery                                                                                                                                                                                                                                                                                                             |
| <i>Left ventricular ejection fraction</i>                                                                                                               |            | Last measured before surgery. Options: Good (>55%), reduced (45-55%), moderate (30-45%), poor (30%) and unknown.                                                                                                                                                                                                                                                            |
| <i>Logistic EUROscore</i>                                                                                                                               |            | As described in patient files                                                                                                                                                                                                                                                                                                                                               |
| <i>Heart rhythm registered on electrocardiogram</i>                                                                                                     |            | As described in patient file or as reported by computer on ECG itself. Options: sinus rhythm (60-100 bpm), sinus tachycardia (>100 bpm), sinus bradycardia (<60 bpm), supraventricular tachycardia (incl: atrial fibrillation/atrial flutter), paced rhythm (atrial and/or ventricular pacing), ventricular tachycardia / fibrillation, other (describe below) and unknown. |
| <i>Explain 'other' rhythm seen on ECG</i>                                                                                                               |            | Other rhythm as described in patient file                                                                                                                                                                                                                                                                                                                                   |
| <i>Any signs of ischemia on ECG?</i>                                                                                                                    |            | As described in patient file or as reported by computer on ECG itself                                                                                                                                                                                                                                                                                                       |
| <i>Remarks on pre-operative status patient</i>                                                                                                          |            | Any important details on pre-operative variables not yet specified                                                                                                                                                                                                                                                                                                          |
| <b><i>Imaging: transthoracic echocardiography, transoesophageal echocardiography, computed tomography (CT) and magnetic resonance imaging (MRI)</i></b> |            |                                                                                                                                                                                                                                                                                                                                                                             |
| <i>Date</i>                                                                                                                                             | dd-mm-yyyy | Date of the performed imaging                                                                                                                                                                                                                                                                                                                                               |

|                                   |             |                                                                                                                                                                                 |
|-----------------------------------|-------------|---------------------------------------------------------------------------------------------------------------------------------------------------------------------------------|
| <i>Annulus diameter</i>           | millimetres | As described in imaging report                                                                                                                                                  |
| <i>Sinus of Valsalva diameter</i> | millimetres | As described in imaging report                                                                                                                                                  |
| <i>ST-junction diameter</i>       | millimetres | As described in imaging report                                                                                                                                                  |
| <i>Ascending aorta diameter</i>   | millimetres | As described in imaging report                                                                                                                                                  |
| <i>Arch diameter</i>              | millimetres | As described in imaging report                                                                                                                                                  |
| <i>Descending aorta diameter</i>  |             | As described in imaging report                                                                                                                                                  |
| <i>Aortic valve stenosis</i>      |             | Is the patient known with aortic valve stenosis?<br><br>Trace= grade 1, slight= grade 2, moderate= grade 3, severe= grade 4                                                     |
| <i>Aortic valve insufficiency</i> |             | Is the patient known with aortic valve insufficiency?<br><br>Trace= grade 1, slight= grade 2, moderate= grade 3, severe= grade 4                                                |
| <i>Aortic valve mixed disease</i> |             | Mixed disease is defined as stenosis and regurgitation                                                                                                                          |
| <i>Mitral valve stenosis</i>      |             | Is the patient known with mitral valve stenosis?<br><br>Trace= grade 1, slight= grade 2, moderate= grade 3, severe= grade 4                                                     |
| <i>Mitral valve insufficiency</i> |             | Is the patient known with mitral valve insufficiency?<br><br>Trace= grade 1, slight= grade 2, moderate= grade 3, severe= grade 4                                                |
| <i>Measurement technique</i>      |             | Technique used to measure LVEF. Options are: M-mode, Quinones, Biplane (Modified Simpson), WMSI, or unknown.                                                                    |
| <i>LVEF</i>                       |             |                                                                                                                                                                                 |
| <i>LV(E)F</i>                     | %           | As described in imaging report                                                                                                                                                  |
| <i>Other abnormalities</i>        |             | Other abnormalities regarding imaging of the aorta                                                                                                                              |
| <i>Remarks</i>                    |             | Any remarks regarding imaging of the aorta                                                                                                                                      |
| <b>Operative</b>                  |             |                                                                                                                                                                                 |
| <i>Urgency of operation</i>       |             | (Duration from diagnosis until surgery). Options: acute (<24 hours), urgent (within 2 weeks or during hospital stay), elective (>2 weeks) and unknown.                          |
| <i>Operation date</i>             |             | The date on which the aortic surgery was performed                                                                                                                              |
| <i>Incision location</i>          |             | Location as described in surgery report. Options: sternotomy, thoracotomy, thoracotomy and laparotomy, other and unknown.                                                       |
| <i>ECC technique</i>              |             | Technique used for ExtraCorporeal Circulation as described in surgery report. Options: none, passive shunt, left heart bypass, full bypass and unknown.                         |
| <i>ECC cannulation arterial</i>   |             | Location of arterial ExtraCorporeal Circulation placement as described in surgery report. Options: none, femoralis, subclavia, aorta ascendens, aortic arch, other and unknown. |



|                                                     |                 |                                                                                                                                                                                                                             |
|-----------------------------------------------------|-----------------|-----------------------------------------------------------------------------------------------------------------------------------------------------------------------------------------------------------------------------|
| <i>Description of other arterial</i>                |                 | As described in surgery report                                                                                                                                                                                              |
| <i>ECC cannulation</i>                              |                 |                                                                                                                                                                                                                             |
| <i>ECC cannulation venous</i>                       |                 | Location of venous ExtraCorporeal Circulation placement as described in surgery report. Options: none, vena cava superior, vena cava inferior, vena cava superior and inferior, right atrium, femoralis, other and unknown. |
| <i>Description of other venous</i>                  |                 | As described in surgery or anaesthesia report                                                                                                                                                                               |
| <i>ECC cannulation</i>                              |                 |                                                                                                                                                                                                                             |
| <i>Perfusion time</i>                               | minutes         | As described in surgery or anaesthesia report                                                                                                                                                                               |
| <i>Cardiac ischemic time</i>                        | minutes         | As described in surgery or anaesthesia report                                                                                                                                                                               |
| <i>Aortic ischemic time</i>                         | minutes         | As described in surgery or anaesthesia report                                                                                                                                                                               |
| <i>Myelum ischemic time</i>                         | minutes         | As described in surgery or anaesthesia report                                                                                                                                                                               |
| <i>Circulatory arrest time</i>                      | minutes         | As described in surgery or anaesthesia report                                                                                                                                                                               |
| <i>Cerebral perfusion type</i>                      | minutes         | As described in surgery or anaesthesia report. Options: none, antegrade unilateral, antegrade bilateral, retrograde and unknown.                                                                                            |
| <i>Cerebral perfusion time</i>                      | minutes         | As described in surgery or anaesthesia report                                                                                                                                                                               |
| <i>Deep hypothermic cardiac arrest (DHCA) used?</i> |                 | As described in surgery or anaesthesia report                                                                                                                                                                               |
| <i>Lowest temperature</i>                           | degrees Celsius | As described in anaesthesia report                                                                                                                                                                                          |
| <i>Location of temperature measurement</i>          |                 | As described in anaesthesia report                                                                                                                                                                                          |
| <i>Time at start ECC</i>                            | hh.mm           | As described in anaesthesia report                                                                                                                                                                                          |
| <i>Temperature at start of ECC</i>                  | degrees Celsius | As described in anaesthesia report                                                                                                                                                                                          |
| <i>Time at start DHCA</i>                           | hh.mm           | As described in anaesthesia report                                                                                                                                                                                          |
| <i>Temperature at start of DHCA</i>                 | degrees Celsius | As described in anaesthesia report                                                                                                                                                                                          |
| <i>Time at end DHCA</i>                             | hh.mm           | As described in anaesthesia report                                                                                                                                                                                          |
| <i>Temperature at end of DHCA</i>                   | degrees Celsius | As described in anaesthesia report                                                                                                                                                                                          |
| <i>Time at end ECC</i>                              | hh.mm           | As described in anaesthesia report                                                                                                                                                                                          |
| <i>Temperature at end of ECC</i>                    | degrees Celsius | As described in anaesthesia report                                                                                                                                                                                          |
| <i>Sievers classification</i>                       |                 | Observed Sievers classification of the bicuspid aortic valve during surgery, as described in surgery report. Options: no BAV, type 0,                                                                                       |

|                                            |             |                                                                                                                                                                                                                                                                                                                                                                                                                               |
|--------------------------------------------|-------------|-------------------------------------------------------------------------------------------------------------------------------------------------------------------------------------------------------------------------------------------------------------------------------------------------------------------------------------------------------------------------------------------------------------------------------|
|                                            |             | type 1 LCC-RCC fusion, type 1 RCC-NCC fusion, type 1 NCC-LCC fusion, type 2 and unknown.                                                                                                                                                                                                                                                                                                                                      |
| <i>Aortic annulus surgery</i>              |             | Was aortic annulus surgery performed? Options: no, yes with ring and unknown.                                                                                                                                                                                                                                                                                                                                                 |
| <i>Aortic valve surgery</i>                |             | Aortic valve surgery performed during aortic surgery. Options: none, repair, replacement with mechanical valve, replacement with bioprosthesis, replacement with homograft, replacement with allograft, replacement with mechanical valved conduit (mechanical Bentall), replacement with biological valved conduit (Bio-Bentall), valve sparing David (reimplantation), valve sparing Yacoub (remodeling), other or unknown. |
| <i>Aortic valve graft size</i>             | millimetres | Graft size used during surgery                                                                                                                                                                                                                                                                                                                                                                                                |
| <i>Aortic root graft size</i>              | millimetres | Graft size used during surgery                                                                                                                                                                                                                                                                                                                                                                                                |
| <i>Ascending aorta surgery</i>             |             | Was ascending aorta surgery performed? Options: none, replacement, repair or other and unknown.                                                                                                                                                                                                                                                                                                                               |
| <i>Ascending aorta graft size</i>          | millimetres | Graft size used during surgery                                                                                                                                                                                                                                                                                                                                                                                                |
| <i>Aortic arch surgery</i>                 |             | Was aortic arch surgery performed? Options: none, replacement, hemi-arch, repair/patch/other, elephant trunc and unknown.                                                                                                                                                                                                                                                                                                     |
| <i>Aortic arch surgery graft size</i>      | millimetres | Graft size used during surgery                                                                                                                                                                                                                                                                                                                                                                                                |
| <i>Reimplantation aortic arch branches</i> |             | Were reimplantation of aortic arch branches performed? Options: none, with patch, separately, en bloc and unknown.                                                                                                                                                                                                                                                                                                            |
| <i>Reimplantation brachiocephalica</i>     |             | Was reimplantation of the brachiocephalic artery performed?                                                                                                                                                                                                                                                                                                                                                                   |
| <i>Reimplantation left common carotid</i>  |             | Was reimplantation of the left common aortic performed?                                                                                                                                                                                                                                                                                                                                                                       |
| <i>Reimplantation left subclavian</i>      |             | Was reimplantation of the left subclavian performed?                                                                                                                                                                                                                                                                                                                                                                          |
| <i>Descending aorta surgery</i>            |             | Was descending aorta surgery performed? Options: none, replacement, repair/patch/other and unknown.                                                                                                                                                                                                                                                                                                                           |
| <i>Reimplantation intercostal arteries</i> |             | Was reimplantation of the intercostal arteries performed?                                                                                                                                                                                                                                                                                                                                                                     |

|                                                               |            |                                                                                                                                                                               |
|---------------------------------------------------------------|------------|-------------------------------------------------------------------------------------------------------------------------------------------------------------------------------|
| <i>Reimplantation intercostal arteries number</i>             |            | As described in anaesthesia report                                                                                                                                            |
| <i>Thoracoabdominal aorta surgery</i>                         |            | Was thoracoabdominal aorta surgery performed? Options: none, distal anastomosis suprarenal, distal anastomosis infrarenal, distal anastomosis beyond bifurcation and unknown. |
| <i>Reimplantation renal arteries</i>                          |            | Was reimplantation of the renal arteries performed?                                                                                                                           |
| <i>Reimplantation visceral arteries</i>                       |            | Was reimplantation of the visceral arteries performed?                                                                                                                        |
| <i>Concomitant procedures</i>                                 |            | Other procedures than aortic aneurysm surgery, or as described before performed. Options: none, CABG, mitral valve surgery, CABG and mitral valve surgery, other and unknown. |
| <i>Description of other concomitant procedures</i>            |            | As described in surgery report                                                                                                                                                |
| <i>Any remarks regarding operative variables</i>              |            |                                                                                                                                                                               |
| <b><i>Postoperative</i></b>                                   |            |                                                                                                                                                                               |
| <i>Numer of days the patient was admitted</i>                 | days       | Total time in days from admission until discharge                                                                                                                             |
| <i>Date of discharge to home, other hospital or institute</i> | dd-mm-yyyy | As described in patient files                                                                                                                                                 |
| <i>Number of days in ICU after surgery</i>                    | days       | Number of days that the patient stayed in the intensive care unit after surgery                                                                                               |
| <i>Number of days on ventilation support after surgery</i>    | days       | Number of days that the patient was on ventilation support after surgery                                                                                                      |
| <i>Death within 30 days OR before hospital discharge</i>      |            | Mortality within 30 days or before hospital discharge. Options: no, yes pre-surgery, yes in operating theatre, yes post-surgery and unknown.                                  |
| <i>Cause of in hospital death</i>                             |            | As described in patient files. Options: no in-hospital death, bleeding, cardiac (incl. tamponade), aortic rupture, organ failure, sepsis, neurologic, other and unknown.      |

|                                                               |                                                                                                                                                                                                                                                                |
|---------------------------------------------------------------|----------------------------------------------------------------------------------------------------------------------------------------------------------------------------------------------------------------------------------------------------------------|
| <i>Reoperation needed</i>                                     | Was reoperation performed? Options: no reoperation, bleeding, tamponade, mediastinitis, cardiac ischemia, other visceral ischemia, structural valve deterioration, non-structural valve dysfunction, other graft dysfunction, endocarditis, other and unknown. |
| <i>Indication for reoperation</i>                             | Indication of reoperation when performed                                                                                                                                                                                                                       |
| <i>Implantation of tracheostoma postop?</i>                   | Did the patient receive implantation of tracheostoma after surgery?                                                                                                                                                                                            |
| <i>New permanent heart rhythm disturbances after surgery?</i> | If postoperative pacemaker or ICD implantation was performed, if medication is used to treat arrhythmia, or if it is named permanent in the patient files. Options: supraventricular, ventricular, AV-block or unknown                                         |
| <i>Pacemaker or ICD implanted after surgery?</i>              | Only when the pacemaker or ICD was implanted within 14 days after surgery. Options: no, yes pacemaker, yes ICD and unknown.                                                                                                                                    |
| <i>What was the indication for pacemaker implantation?</i>    | As described in patient files                                                                                                                                                                                                                                  |
| <i>What was the indication for ICD implantation?</i>          | As described in patient files                                                                                                                                                                                                                                  |
| <i>Myocardial infarction or ischemia after surgery</i>        | During admission or within 30 days after surgery                                                                                                                                                                                                               |
| <i>Other cardiac complications after surgery?</i>             | During admission or within 30 days after surgery                                                                                                                                                                                                               |
| <i>Explain 'other' cardiac complication after surgery</i>     |                                                                                                                                                                                                                                                                |
| <i>Bleeding event after surgery</i>                           | During admission or within 30 days after surgery                                                                                                                                                                                                               |
| <i>Explain bleeding event after surgery</i>                   | During admission or within 30 days after surgery                                                                                                                                                                                                               |
| <i>Diagnosis of infective endocarditis after surgery?</i>     | During admission or within 30 days after surgery                                                                                                                                                                                                               |
| <i>Structural valve deterioration after surgery?</i>          | During admission or within 30 days after surgery. Structural valve deterioration was defined as a result of failure of the valve itself.                                                                                                                       |
| <i>Describe type of structural valve deterioration:</i>       |                                                                                                                                                                                                                                                                |

|                                                                         |            |                                                                                                                                                                                         |
|-------------------------------------------------------------------------|------------|-----------------------------------------------------------------------------------------------------------------------------------------------------------------------------------------|
| <i>Non-structural valve dysfunction after surgery?</i>                  |            | During admission or within 30 days after surgery.                                                                                                                                       |
| <i>Describe type of non-structural valve dysfunction</i>                |            | Non-structural valve disease was defined as not due to the fall of the valve itself resulting in stenosis, regurgitation or hemolysis. Valve thrombosis and infection are not included. |
| <i>Valve thrombosis after surgery?</i>                                  |            | During admission or within 30 days after surgery                                                                                                                                        |
| <i>Left ventricular thrombus diagnosed after surgery?</i>               |            | During admission or within 30 days after surgery                                                                                                                                        |
| <i>Lowest eGFR measured during admittance after surgery?</i>            |            | During admission or within 30 days after surgery. For the study, only the CKD-EPI eGFR measurement was used.                                                                            |
| <i>Last eGFR-level measured before discharge</i>                        |            | For the study, only the CKD-EPI eGFR measurement was used                                                                                                                               |
| <i>Last creatinine-level measured before discharge</i>                  | micromol/L | During admission or within 30 days after surgery                                                                                                                                        |
| <i>TIA after Surgery?</i>                                               |            | During admission or within 30 days after surgery                                                                                                                                        |
| <i>CVA diagnosed after surgery?</i>                                     |            | During admission or within 30 days after surgery                                                                                                                                        |
| <i>Spinal cord lesion after surgery</i>                                 |            | During admission or within 30 days after surgery                                                                                                                                        |
| <i>New recurrence nerve lesion after surgery</i>                        |            | During admission or within 30 days after surgery                                                                                                                                        |
| <i>Other neurological complications?</i>                                |            | During admission or within 30 days after surgery                                                                                                                                        |
| <i>Describe other neurological complications diagnosed.</i>             |            | During admission or within 30 days after surgery                                                                                                                                        |
| <i>Diagnosis of psychiatric disorder after surgery (e.g. delirium)?</i> |            | During admission or within 30 days after surgery. Delirium also falls under this category.                                                                                              |
| <i>Diagnosis of any infection after surgery?</i>                        |            | During admission or within 30 days after surgery                                                                                                                                        |

*Describe the type of  
infection(s) that occurred  
after surgery*

Superficial wound infection was defined as wound infections for which no reoperation has been performed. Deep wound infection was defined as wound infection for which reoperation has been performed.

*Diagnosis of sepsis after  
surgery?*

During admission or within 30 days after surgery

*Occurrence of any vascular  
complications (eg ischemia,  
thrombosis, compartment  
syndrome)*

During admission or within 30 days after surgery

*Describe the vascular  
complication that occurred*

*If any other post-surgery  
complications were  
registered (eg pulmonary  
embolism, pneumothorax,  
decubitus, urinary retention)  
please explain here:*

During admission or within 30 days after surgery

# Supplemental File S3. Extra-analyses for the $\geq 75$ years patient population

**Table S1. Short-term Mortality and Admission Days after Elective Aortic Aneurysm Surgery**

|                                                                     | Total<br>(n= 955) | <u>Aged &lt;75</u><br><u>yrs (n= 849)</u> | <u>Aged <math>\geq 75</math></u><br><u>yrs (n= 106)</u> | p-value            | Missings         |
|---------------------------------------------------------------------|-------------------|-------------------------------------------|---------------------------------------------------------|--------------------|------------------|
| In-hospital or 30-day Mortality                                     | 18 (1.9)          | 14 (1.6)                                  | 4 (3.8)                                                 | 0.13               | 0/955            |
| Cause of Mortality                                                  |                   |                                           |                                                         |                    | 0/955            |
| Cardiac (incl. Tamponade)                                           | 8 (0.8)           | 7 (0.8)                                   | 1 (0.9)                                                 | 1.00               |                  |
| Bleeding                                                            | 3 (0.3)           | 2 (0.2)                                   | 1 (0.9)                                                 | 0.30               |                  |
| Aortic Rupture                                                      | 2 (0.2)           | 2 (0.2)                                   | 0 (0.0)                                                 | 1.00               |                  |
| Organ Failure                                                       | 1 (0.1)           | 0 (0.0)                                   | 1 (0.9)                                                 | 0.11               |                  |
| Sepsis                                                              | 2 (0.2)           | 2 (0.2)                                   | 0 (0.0)                                                 | 1.0                |                  |
| Other                                                               | 1 (0.1)           | 0 (0.0)                                   | 1 (0.9)                                                 | 0.11               |                  |
| Number of Days the patient was<br>Admitted <sup>a</sup>             |                   |                                           |                                                         |                    | 0/955            |
| 1-4                                                                 | 23 (2.4)          | 21 (2.5)                                  | 2 (1.9)                                                 | 1.00               |                  |
| 5-9                                                                 | 590 (61.7)        | 528 (62.2)                                | 62 (58.5)                                               | 0.46               |                  |
| 10-14                                                               | 206 (21.5)        | 183 (21.6)                                | 22 (20.8)                                               | 0.85               |                  |
| 15-19                                                               | 66 (6.9)          | 59 (6.9)                                  | 7 (6.6)                                                 | 1.000              |                  |
| 15-19                                                               | 71 (7.4)          | 58 (6.8)                                  | 13 (12.3)                                               | <b>0.044*</b>      |                  |
| $\geq 20$                                                           | 8.0 (7.0-11.0)    | 8.0 (7.0-11.0)                            | 9.0 (7.0-13.0)                                          | 0.40               |                  |
| Total <sup>#</sup>                                                  |                   |                                           |                                                         |                    |                  |
| Number of Days in ICU <sup>1</sup> after Surgery <sup>a</sup>       |                   |                                           |                                                         |                    | (23/849)/(1/106) |
| 1-4                                                                 | 828 (86.6)        | 744 (90.0)                                | 84 (80.0)                                               | <b>0.002**</b>     |                  |
| 5-9                                                                 | 71 (7.4)          | 57 (6.9)                                  | 14 (13.3)                                               | <b>0.019**</b>     |                  |
| 10-14                                                               | 18 (1.9)          | 14 (1.7)                                  | 4 (3.8)                                                 | 0.14               |                  |
| 15-19                                                               | 5 (0.5)           | 4 (0.5)                                   | 1 (1.0)                                                 | 0.45               |                  |
| $\geq 20$                                                           | 10 (1.0)          | 8 (1.0)                                   | 2 (1.9)                                                 | 0.31               |                  |
| Total <sup>#</sup>                                                  | 2.0 (2.0-3.0)     | 2.0 (2.0-3.0)                             | 2.0 (2.0-4.0)                                           | <b>&lt;0.001**</b> |                  |
| Number of Days on Ventilation Support<br>after Surgery <sup>a</sup> |                   |                                           |                                                         |                    | (32/849)/(5/106) |
| 1                                                                   | 552 (57.7)        | 512 (62.6)                                | 39 (38.6)                                               | <b>&lt;0.001**</b> |                  |
| 2                                                                   | 308 (32.2)        | 257 (31.4)                                | 51 (50.5)                                               | <b>&lt;0.001**</b> |                  |
| 3                                                                   | 19 (2.0)          | 17 (2.1)                                  | 2 (2.0)                                                 | 1.00               |                  |
| 4                                                                   | 10 (1.0)          | 9 (1.1)                                   | 1 (1.0)                                                 | 1.00               |                  |
| $\geq 5$                                                            | 31 (3.2)          | 23 (2.8)                                  | 8 (7.9)                                                 | <b>0.015**</b>     |                  |
| Total <sup>#</sup>                                                  | 1.0 (1.0-2.0)     | 1.0 (1.0-2.0)                             | 2.0 (1.0-2.0)                                           | <b>&lt;0.001**</b> |                  |

Continuous data are presented as mean  $\pm$  SD when the distribution is normal, or median (Interquartile Range, IQR) for variables without normal distribution. Categorical data are presented as frequencies (percentages).

<sup>#</sup> Presented as median (Interquartile Range, IQR) of the total number of days in the whole, nonelderly and elderly population

ICU: Intensive Care Unit

<sup>a</sup>Significant differences were mainly found in the outliers in the number of days in elderly patients.

<sup>1</sup>NE/E: Nonelderly/Elderly

\* Significant at the 0.05 level

\*\* Significant at the 0.01 level

**Table S2. Short-term Postoperative Morbidity After Elective Aortic Aneurysm Surgery**

|                                         | <b>Total<br/>(n= 955)</b> | <b><u>Aged &lt;75 yrs</u><br/>(n= 849)</b> | <b><u>Aged ≥75 yrs</u><br/>(n= 104)</b> | <b>p-value</b>     | <b>Missings</b> |
|-----------------------------------------|---------------------------|--------------------------------------------|-----------------------------------------|--------------------|-----------------|
| Tracheostoma Implantation               | 8 (0.8)                   | 6 (0.7)                                    | 2 (1.9)                                 | 0.22               | (1/849)/(0/106) |
| New Permanent Heart Rhythm Disturbances | 245 (25.7)                | 201 (23.7)                                 | 44 (41.5)                               | <b>&lt;0.001**</b> | (3/849)/(0/106) |
| Supraventricular                        | 211 (22.1)                | 169 (19.9)                                 | 42 (39.6)                               | <b>&lt;0.001**</b> |                 |
| Ventricular                             | 6 (0.6)                   | 6 (0.7)                                    | 0 (0.0)                                 | 1.00               |                 |
| AV-block                                | 28 (2.9)                  | 25 (2.9)                                   | 2 (1.9)                                 | 0.76               |                 |
| Pacemaker or ICD Implanted              | 32 (3.3)                  | 30 (3.5)                                   | 2 (1.9)                                 | 0.57               | 0/955           |
| Myocardial Infarction or Ischemia       | 18 (1.9)                  | 16 (1.9)                                   | 2 (1.9)                                 | 1.00               | 0/955           |
| Other Cardiac Complications             | 69 (7.2)                  | 57 (6.7)                                   | 12 (11.3)                               | 0.086              | (2/849)/(0/106) |
| Infective Endocarditis                  | 4 (0.4)                   | 3 (0.4)                                    | 1 (0.9)                                 | 0.38               | (3/849)/(0/106) |
| Non-Structural Valve Dysfunction        | 2 (0.2)                   | 2 (0.2)                                    | 0 (0.0)                                 | 1.00               | 0/955           |
| CVA/TIA                                 | 43 (4.5)                  | 38 (4.5)                                   | 5 (4.7)                                 | 0.81               | (2/849)/(0/106) |
| New Recurrence Nerve Lesion             | 12 (1.3)                  | 12 (1.4)                                   | 0 (0.0)                                 | 0.38               | 0/955           |
| Other Neurological Complications        | 33 (3.5)                  | 28 (3.3)                                   | 5 (4.7)                                 | 0.40               | (1/849)/(0/106) |
| Diagnosis of Psychiatric Disorder       | 146 (15.3)                | 105 (12.4)                                 | 41 (38.7)                               | <b>&lt;0.001**</b> | 0/955           |
| Diagnosis of Infection                  | 130 (13.6)                | 108 (12.7)                                 | 22 (20.8)                               | <b>0.023**</b>     | 0/955           |
| Pneumonia                               | 60 (6.3)                  | 49 (5.8)                                   | 11 (10.4)                               | 0.065              |                 |
| Superficial Wound Infection             | 15 (1.6)                  | 12 (1.4)                                   | 3 (2.8)                                 | 0.23               |                 |
| Severe Wound Infection                  | 10 (1.0)                  | 7 (0.8)                                    | 3 (2.8)                                 | 0.089              |                 |
| Urinary Tract Infection                 | 18 (1.9)                  | 14 (1.6)                                   | 4 (3.8)                                 | 0.13               |                 |
| Other                                   | 15 (1.6)                  | 15 (1.8)                                   | 0 (0.0)                                 | 0.40               |                 |
| Of Unknown Origin                       | 25 (2.6)                  | 20 (2.4)                                   | (4.7)                                   | 0.19               |                 |
| Diagnosis of Sepsis                     | 11 (1.2)                  | 9 (1.1)                                    | 2 (1.9)                                 | 0.35               | 0/955           |
| Diagnosis of Vascular Complications     | 15 (1.6)                  | 11 (1.3)                                   | 4 (3.8)                                 | 0.074              | 0/955           |

Continuous data are presented as mean ± SD when the distribution is normal, or median (Interquartile Range, IQR) for variables without normal distribution. Categorical data are presented as frequencies (percentages).

CVA/TIA: Cerebrovascular Accident/Transient Ischemic Attack

\* Significant at the 0.05 level

\*\* Significant at the 0.01 level



# Supplemental File S4. Univariable analysis on factors associated with long-term survival

|                                                                        | <i>Total (n=928)</i> |                    | <i>Elderly (n=227)</i> |               | <i>Nonelderly (n=701)</i> |                    |
|------------------------------------------------------------------------|----------------------|--------------------|------------------------|---------------|---------------------------|--------------------|
|                                                                        | HR (95% CI)          | p-value            | HR (95% CI)            | p-value       | HR (95% CI)               | p-value            |
| <b>Baseline</b>                                                        |                      |                    |                        |               |                           |                    |
| Male sex                                                               | 0.51 (0.38-0.69)     | <b>&lt;0.001**</b> | 1.07 (0.69-1.64)       | 0.765         | 0.55 (0.35-0.86)          | <b>0.009**</b>     |
| Age                                                                    | 1.08 (1.06-1.09)     | <b>&lt;0.001**</b> | 1.06 (0.99-1.13)       | 0.081         | 1.06 (1.04-1.09)          | <b>&lt;0.001**</b> |
| BSA                                                                    | 0.21 (0.11-0.40)     | <b>&lt;0.001**</b> | 0.62 (0.21-1.87)       | 0.398         | 0.45 (0.18-1.13)          | 0.088              |
| History of hypertension                                                | 2.73 (1.90-3.92)     | <b>&lt;0.001**</b> | 2.64 (1.21-5.78)       | <b>0.015*</b> | 1.56 (0.99-2.45)          | 0.055              |
| History of hyperlipidaemia                                             | 1.64 (1.20-2.23)     | <b>0.001**</b>     | 1.12 (0.74-1.72)       | 0.587         | 1.60 (1.01-2.53)          | <b>0.045*</b>      |
| Diabetes                                                               | 1.42 (0.82-2.46)     | 0.216              | 0.24 (0.06-0.97)       | <b>0.045*</b> | 3.25 (1.75-6.03)          | <b>&lt;0.001**</b> |
| COPD                                                                   | 1.94 (1.26-2.98)     | <b>0.003**</b>     | 1.13 (0.62-2.05)       | 0.694         | 2.13 (1.12-4.05)          | <b>0.021*</b>      |
| Prior CVA                                                              | 1.02 (0.64-1.63)     | 0.925              | 1.14 (0.65-1.99)       | 0.645         | 0.60 (0.24-1.48)          | 0.266              |
| Prior MI                                                               | 1.34 (0.66-2.70)     | 0.415              | 0.79 (0.26-2.40)       | 0.678         | 1.82 (0.74-4.51)          | 0.194              |
| Chronic kidney disease                                                 | 2.75 (1.66-4.56)     | <b>&lt;0.001**</b> | 1.85 (1.00-3.41)       | 0.051         | 2.20 (0.88-5.46)          | 0.091              |
| Prior aortic surgery                                                   | 0.48 (0.25-0.92)     | <b>0.026*</b>      | 0.78 (0.29-2.14)       | 0.631         | 0.57 (0.25-1.32)          | 0.188              |
| Prior dissection or aneurysm in major artery other than thoracic aorta | 0.52 (0.13-2.11)     | 0.362              | 1.13 (0.26-4.86)       | 0.868         | 0.05 (0.00-36.07)         | 0.369              |
| BAV                                                                    | 0.65 (0.47-0.90)     | <b>0.010*</b>      | 0.76 (0.42-1.37)       | 0.366         | 1.10 (0.71-1.71)          | 0.675              |
| <b>Presentation</b>                                                    |                      |                    |                        |               |                           |                    |
| GFR                                                                    | 0.97 (0.97-0.98)     | <b>&lt;0.001**</b> | 0.99 (0.98-1.00)       | 0.112         | 0.98 (0.97-0.99)          | <b>&lt;0.001**</b> |
| Log Euroscore                                                          | 1.04 (1.03-1.06)     | <b>&lt;0.001**</b> | 1.00 (0.98-1.02)       | 0.944         | 1.03 (1.01-1.06)          | <b>0.017*</b>      |
| <b>Surgery</b>                                                         |                      |                    |                        |               |                           |                    |
| Perfusion time                                                         | 1.00 (1.00-1.00)     | 0.178              | 1.00 (1.00-1.01)       | 0.102         | 1.00 (1.00-1.01)          | 0.443              |
| AoX time                                                               | 1.00 (1.00-1.00)     | 0.899              | 1.00 (1.00-1.01)       | 0.272         | 1.00 (1.00-1.01)          | 0.968              |
| DHCA                                                                   | 1.72 (1.26-2.33)     | <b>&lt;0.001**</b> | 1.26 (0.81-1.95)       | 0.300         | 1.35 (0.87-2.11)          | 0.180              |
| Aortic valve surgery                                                   | 1.35 (0.94-1.93)     | 0.107              | 1.01 (0.63-1.60)       | 0.980         | 1.07 (0.59-1.94)          | 0.828              |
| Aortic arch surgery                                                    | 0.54 (0.40-0.74)     | <b>&lt;0.001**</b> | 0.68 (0.44-1.06)       | 0.085         | 0.74 (0.47-1.15)          | 0.182              |
| Ascending aortic surgery                                               | 8.15 (2.02-32.85)    | <b>0.003**</b>     | 1.30 (0.18-9.37)       | 0.794         | 9.46 (1.32-68.00)         | <b>0.026*</b>      |
| Supracoronary replacement                                              | 1.44 (1.06-1.96)     | <b>0.018*</b>      | 1.16 (0.76-1.77)       | 0.483         | 1.07 (0.68-1.70)          | 0.770              |
| VSARR                                                                  | 0.23 (0.10-0.52)     | <b>&lt;0.001**</b> | 0.89 (0.28-2.84)       | 0.846         | 0.20 (0.06-0.64)          | <b>0.006**</b>     |
| Concomitant procedures                                                 | 2.05 (1.47-2.85)     | <b>&lt;0.001**</b> | 1.35 (0.83-2.20)       | 0.226         | 1.82 (1.15-2.89)          | <b>0.011*</b>      |

Data is presented as Hazard Ratio (95% percent confidence interval)

BSA= Body Surface Area; COPD: Chronic Obstructive Pulmonary Disease, CVA: Cerebrovascular Accident, MI: Myocardial Infarction, BAV= Bicuspid Aortic Valve; AA: Aortic Aneurysm, LVEF: Left Ventricular Ejection Fraction, HTAD: Hereditary Thoracic Aortic Disease, NYHA: New York Heart Association, GFR: Glomerular Filtration Rate, DHCA: Deep Hypothermic Cardiac Arrest, BAV: Bicuspid Aortic Valve, ICU: Intensive Care Unit
